# Supplementary material
Source: ML conference proceedings conference paper supplement (https://www.ecva.net/papers/eccv_2024/papers_ECCV/html/7083_ECCV_2024_paper.php)
Supplement: Supplementary file 1 [file 07083-supp.pdf]

## Supplementary Material

### Example visualizations

As the visualization results Figure 5 (Cityscapes  $\rightarrow$  Foggy-Cityscapes) illustrate, SFUT and AdaBN + Fixed SF-FM can efficiently detect objects that the source pre-trained model ignores, especially shrouded people in fog, stacked bicycles, and incomplete cars. AdaBN also shows a significantly better performance than the source model.

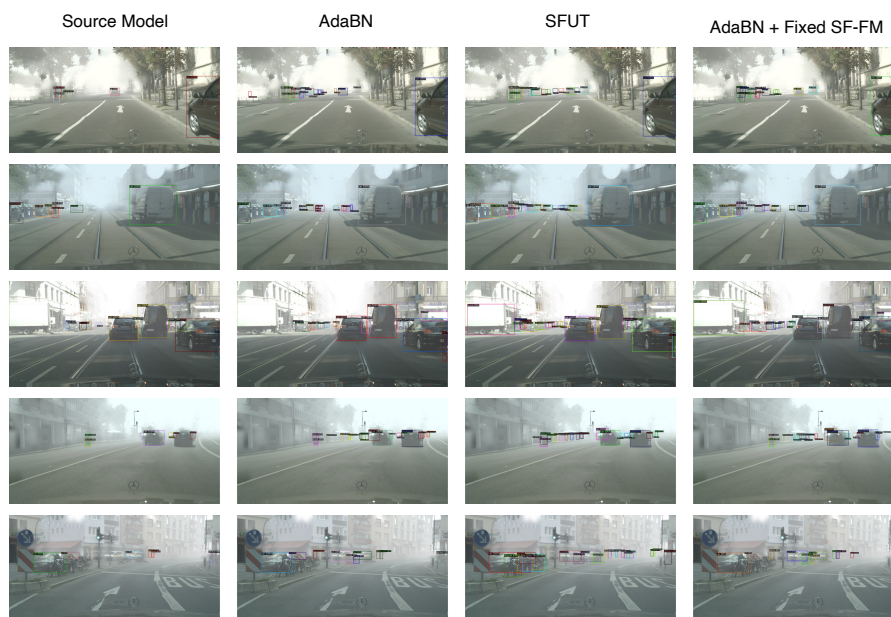

**Fig. 5:** Illustration of the visualization results from different models. From left to right, they are source model, AdaBN model, SF-UT model and AdaBN + Fixed SF-FM. The adaptation task is from Cityscapes to Foggy-Cityscapes. The images shown are on Foggy-Cityscapes.

### Code

The code of this submission can be found at <https://github.com/EPFL-IMOS/simple-SFOD>.
